# Supplementary material for: Side-Chain-Assisted Transition of Conjugated Polymers from a Semiconductor to Conductor and Comparison of Their NO2 Sensing Characteristics
Source: MDPI journal article supplement (doi:10.3390/ma16072877), 2023-04-04
Supplement: s1 [file s1]

## Supporting information

### Side-Chain-Assisted Transition of Conjugated Polymers from a Semiconductor to Conductor and Comparison of their NO<sub>2</sub> Sensing Characteristics

Yejin Ahn, Sooji Hwang, Hyojin Kye, Min Seon Kim, Wi Hyoung Lee, and Bong-Gi Kim \*

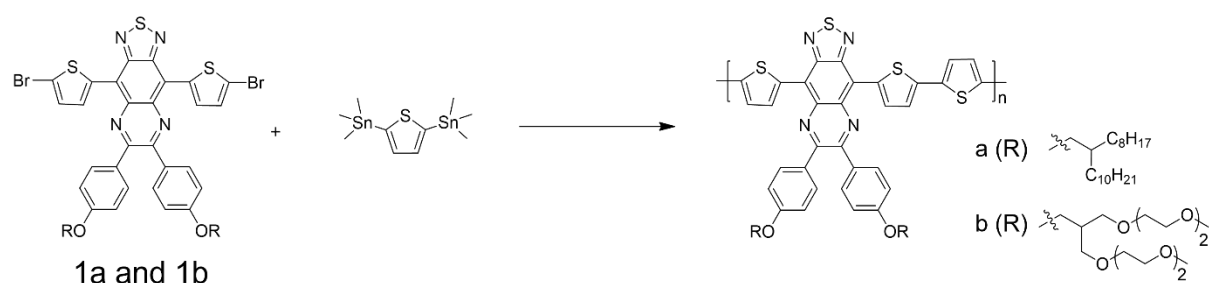

**Scheme S1.** Detailed chemical structures and polymerization scheme of CPs.

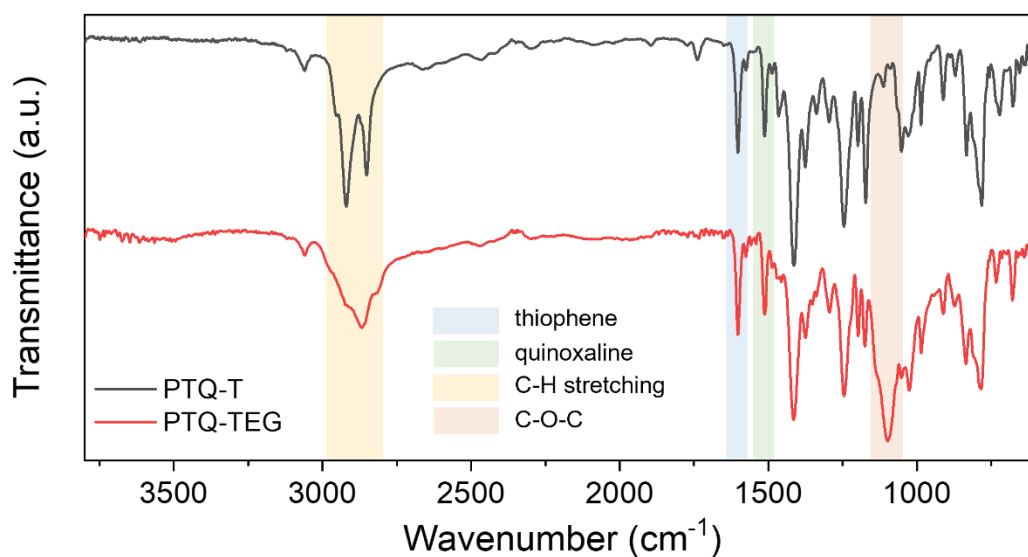

**Figure S1.** FT-IR absorption spectra (a) **PTQ-T** and (b) **PTQ-TEG**.

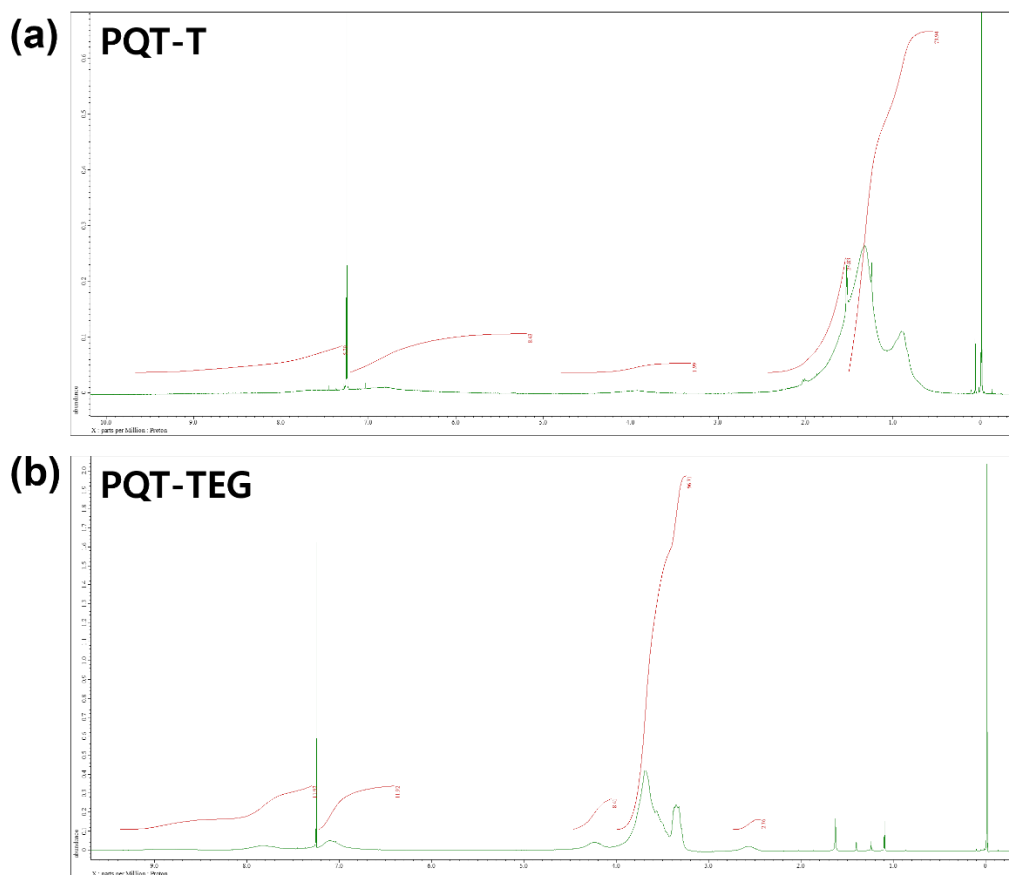

**Figure S2.**  $^1\text{H}$ -NMR spectra of (a) **PTQ-T** and (b) **PTQ-TEG**.

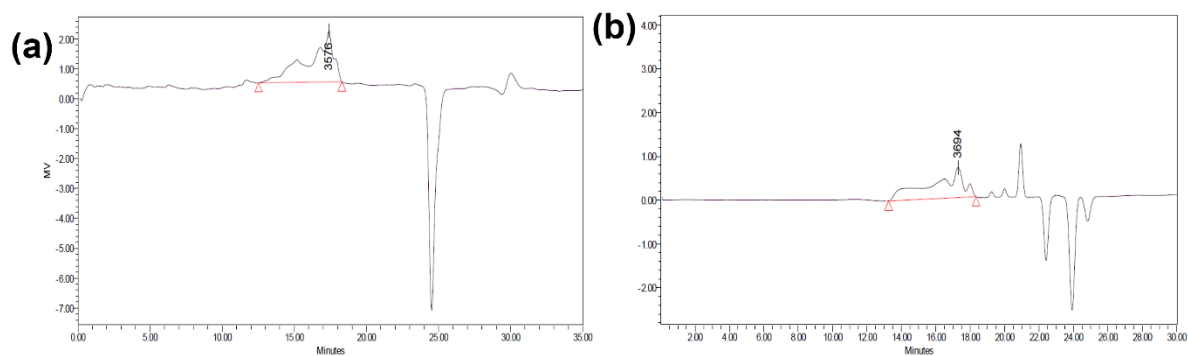

**Figure S3.** Molecular weight of (a) **PTQ-T** and (b) **PTQ-TEG**, which were determined using gel permeation chromatography with elution of chloroform.

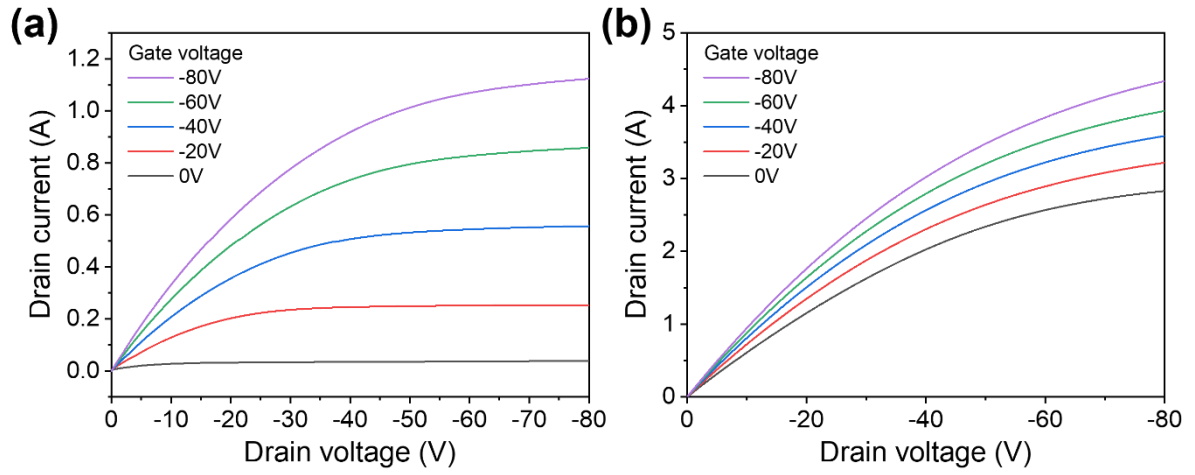

**Figure S4.** Output curve characteristics of (a) **PTQ-T** and (b) **PTQ-TEG** according to  $V_G$  in FET device.

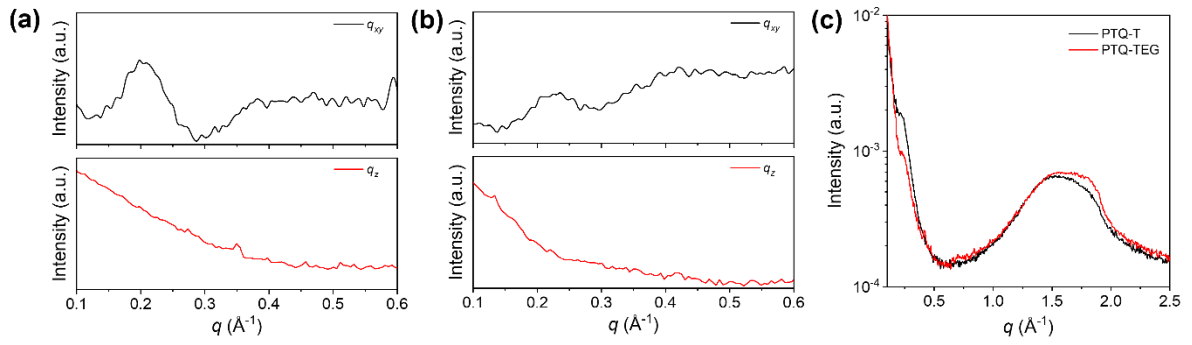

**Figure S5.** XRD diffraction patterns in the small  $q$  region of (a) **PTQ-T** and (b) **PTQ-TEG**, and (c) average XRD diffraction patterns of all direction in both CPs.

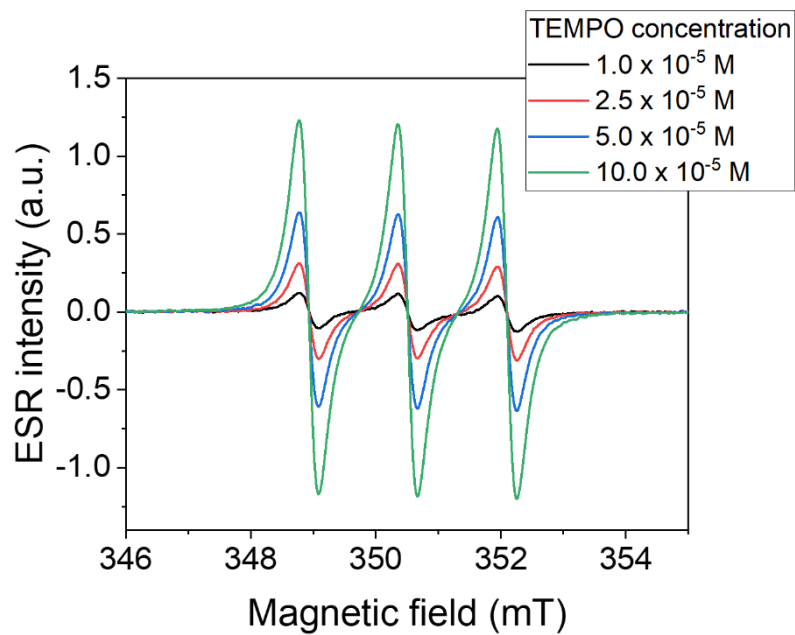

**Figure S6.** ESR intensity according to TEMPO concentration.

|               | PTQ-T                                                                                      | PTQ-TEG                                                                                      |
|---------------|--------------------------------------------------------------------------------------------|----------------------------------------------------------------------------------------------|
| Water         | 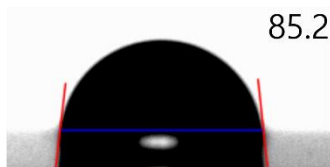 85.21° |  68.06 ° |
| Diiodomethane |  41.07° |  34.07°  |
| Glycerol      |  76.32° |  60.62 ° |

**Figure S7.** Contact angle of each solvent on the CP films.

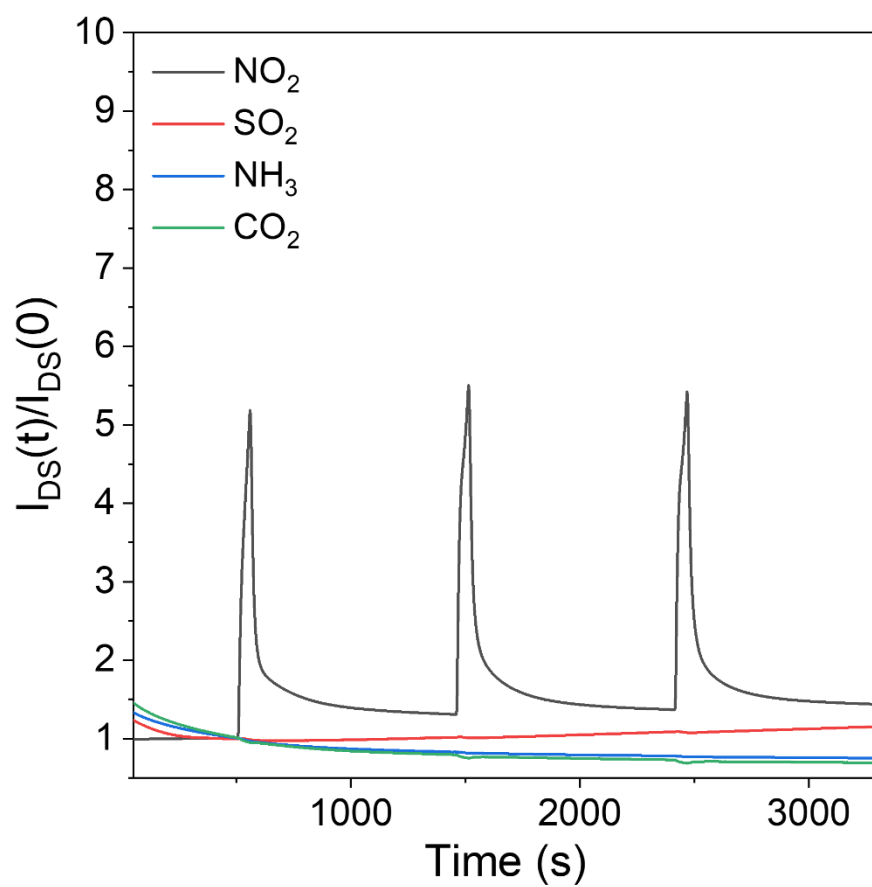

**Figure S8.** Response pattern of **PTQ-TEG** resistive sensor to common gases.

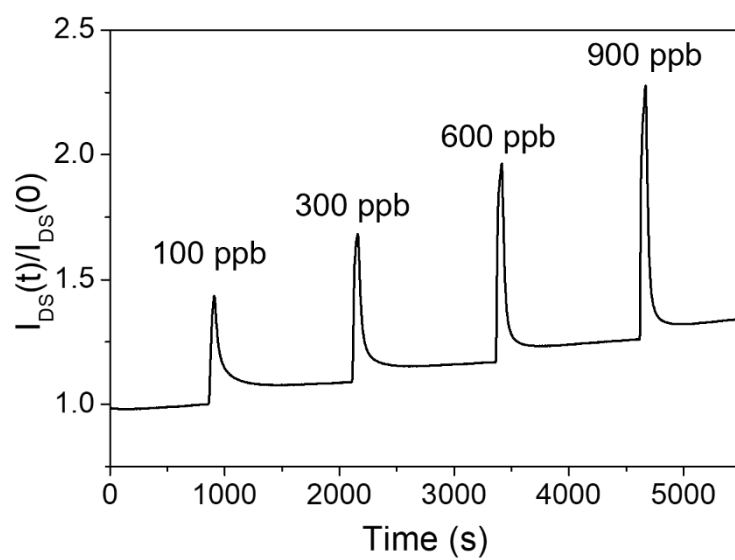

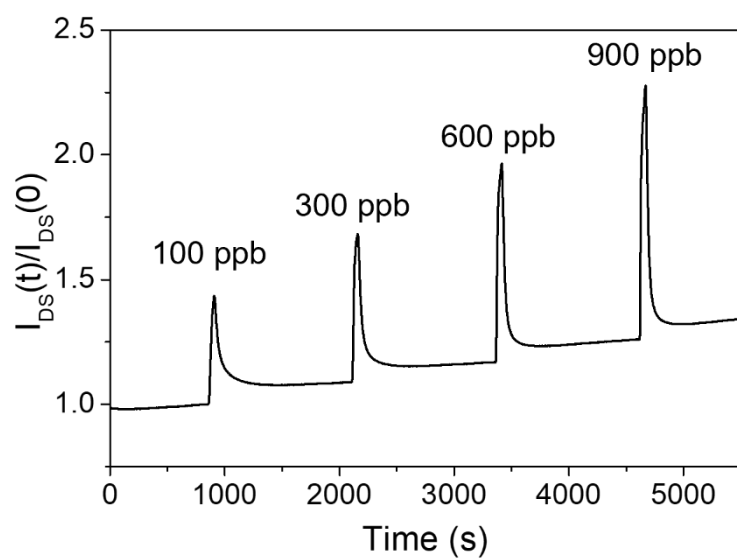

**Figure S9.** Response pattern of **PTQ-TEG** resistive sensor according to  $\text{NO}_2$  concentration.
